# Supplementary figures and images for: An injectable nano-hydroxyapatite (n-HA)/glycol chitosan (G-CS)/hyaluronic acid (HyA) composite hydrogel for bone tissue engineering
Source: Royal Society of Chemistry journal article supplement (doi:10.1039/c5ra26160k), 2016-01-01

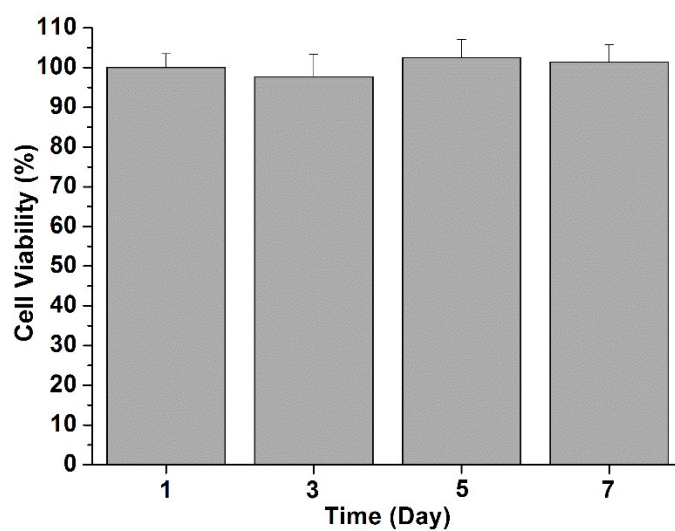

**Fig.S1** Cell viability of hydrogels after 1, 3, 5 and 7days incubation

Supplement: c5ra26160k1.pdf [file c5ra26160k1.pdf]
